# Supplementary material for: Altered peripheral amino acid profile indicate a systemic impact of active celiac disease and a possible role of amino acids in disease pathogenesis
Source: PLoS One. 2018 Mar 14;13(3):e0193764. doi: 10.1371/journal.pone.0193764 (PMC5851604; doi:10.1371/journal.pone.0193764)
Supplement: S1 Table — (XLSX) [file pone.0193764.s001.xlsx]

## Sheet: AMINOSYRORmalmö_1
Patient	Batch	Batch2	Ageatdiagnosis	Sex	F.Female.M.Male	diagnosis	DIAGNOSIStext	Alanine	Arginine	Asparagine	AsparticAcid	Citrulline	Cystine	Glutamicacid	Glutamine	Glycine	Histidine	Isoleucine	Leucine	Lysine	Methionine	Ornithine	Phenylalanine	Proline	Serine	Taurine	Threonine	Tryptophane	Tyrosine	Valine
1	7	1	2.8	1	F	2	CASE	299.6	34.4	55.7	8.7	110.2	5.4	107.1	496.8	224.7	111.5	40.5	79.3	104.7	15.1	52.9	38.4	120.3	122.6	85.8	78.8	52.4	55.5	164
2	7	1	5.2	2	M	1	CONTROL	211.6	45	36.1	9.5	116.6	2	110.7	358.5	202.7	79.5	54.6	114.5	90.1	10.7	60.3	43	119	125.4	62.3	76.6	39.5	57.8	189.9
3	7	1	5.3	2	M	2	CASE	155.3	12.9	25.3	17.7	86.4	2.7	178	144	133	86.2	94.6	191.2	77.1	6.3	83.5	61	86.7	135.9	70.4	69.7	35.9	50.3	233.3
4	7	1	13.9	1	F	1	CONTROL	352.2	67.2	54.5	11.7	166.2	6.2	162.1	486.5	200.2	105.6	78.6	137.8	118.1	12.6	73.4	56.1	175.3	189.3	75.3	148.4	51	79.9	194.9
5	7	1	14.9	2	M	1	CONTROL	359	40.6	36	12.7	183.1	2.4	260	287	195.8	97	57.5	110.5	83.7	6.4	41.4	47.9	185.8	130.3	82.5	106.3	37.9	50.6	175.7
6	7	1	4.9	1	F	2	CASE	195.1	44.1	34.3	9.3	115.1	5.6	165.1	383.6	173.1	107.6	45.5	88.2	86.7	11.6	38.2	38.2	131.7	116.6	63.6	85.4	35.9	49.6	167
7	7	1	3.7	2	M	2	CASE	275.5	41	41	12	127.2	8.1	218.7	364.7	224.3	97.8	45.6	92.4	89.5	7.1	56.9	34.6	164.2	146.3	86.1	96.9	50.2	43.3	161.6
8	7	1	11.3	1	F	2	CASE	301.9	50.2	38.5	10.3	130.3	8.4	98.6	443.6	176	98.1	51.5	112.6	103.7	8.2	89.3	37	160.3	118.2	53.2	110.6	40.1	71.4	191.8
9	7	1	3.2	1	F	2	CASE	171.4	33.4	49.2	5.8	93.1	2.8	63.4	486.9	173.2	105.9	55.6	125	80.2	11	47.8	39.2	101.5	114.9	54.5	65.3	44.3	53	200.9
10	7	1	4.7	1	F	2	CASE	299.9	22.1	40.6	6.1	107.5	4.4	68.2	527.1	154.8	95.8	44.1	94.5	122.3	12.7	108.3	36.7	118.7	88.4	63.7	92.3	34.5	50.3	163.5
11	7	1	3.9	1	F	2	CASE	277.7	39.7	46.4	6.7	101.5	4.7	66.7	531.4	217	98.1	37.8	75.6	84.7	13.3	41.2	36.7	113.6	128.3	61.4	85.8	40.5	49.6	161.9
12	7	1	10.3	1	F	1	CONTROL	197.1	67	42.3	4.7	111.4	3.6	57.3	508.8	179.7	83.8	58	114.6	96.7	14.4	38.5	37.8	124.8	115.7	27.3	96.2	36.3	49.4	196.3
13	7	1	10.9	1	F	2	CASE	309.3	48.9	38.8	9.9	124.9	5.7	120	380.6	159.8	111	77	170.5	133.3	19.5	64.8	58.7	159.4	109.3	217.2	97.5	60.9	70.4	231.5
14	7	1	12.5	1	F	2	CASE	288.5	50	42.1	10.9	134.5	5.5	135.7	586.3	159.4	103.8	67.9	158.5	137.6	19.7	70.4	46.1	169.6	129.9	261.9	98.4	39.3	80.5	213.9
15	7	1	17.8	2	M	1	CONTROL	240.6	44.1	42.3	5.2	141.9	4.4	83	481.7	160.5	93.8	79.5	165.7	123	17.4	59.8	57.2	144.1	114.3	181.6	80.1	41.7	48.6	215
16	7	1	4.8	1	F	2	CASE	255.8	27.1	41.4	5.7	141.7	4.2	88.3	580.7	159.5	108	40.5	76.5	86.5	11.4	68.9	32	181.5	121.6	55.1	62.7	46.3	45.2	176.7
17	7	1	3.6	1	F	2	CASE	203.5	26.5	35.7	7.6	97.9	4.9	83.4	528.6	207	98.9	40.8	80.5	88.9	12.6	61.8	36.6	102.9	125.5	55.9	68.3	38.9	56	155.5
18	7	1	5.3	1	F	2	CASE	362.4	39.1	31.1	5	158.8	5.4	55	460.4	219.4	95.3	37.8	78.2	90.5	12.6	53.8	37.3	211.3	88.3	58.3	62.6	37	56.3	154
19	7	1	17.7	1	F	1	CONTROL	302	66.9	51.2	5.8	373.3	6.2	82.5	655.5	201.4	109.8	37.5	87.4	140	18.9	81.2	34.7	346.6	146.7	41.8	127.7	42.2	66	162.4
20	7	1	12.1	2	M	2	CASE	291.5	42.8	46.1	13.4	110.7	4.9	238.5	281.4	232.2	92.1	68.6	154.1	104.4	13.3	64	49	139	136.5	159	101.3	36.9	51	197.3
21	7	1	3.5	2	M	2	CASE	275	34.2	56	31	119.2	4.4	221.4	396.2	254.3	117.4	51.6	137.4	115.9	9.2	76.2	61.5	145.2	179.2	138.5	99	35.4	68.9	194.7
22	7	1	3.7	1	F	2	CASE	299.5	21.7	49.8	9.7	106.5	3.6	114.9	421.9	216.9	105.2	41.9	105.3	114.7	13.4	72.3	42.3	112.9	119.1	108.6	75.6	40.3	43.2	168.2
23	7	1	5.2	1	F	2	CASE	364.6	25.3	44.9	9.1	99.5	4.9	108.6	454.8	235.9	104.3	38.7	111.2	127.5	12.9	78.1	45.9	107.1	105	123.2	77.8	57.5	51.8	162.8
24	7	1	17.3	1	F	1	CONTROL	277.4	44.8	43.7	8.2	160.5	3.4	114.3	461.6	198.6	110.7	74.1	154.5	121.6	16.7	84.4	61.5	169.9	124	113	88.2	29.8	85.5	230
25	7	1	4.5	2	M	1	CONTROL	348.8	50.4	59.5	10.8	125.6	2.4	126.8	591.6	289.8	114.2	45	112.8	104.1	17.1	62.2	44.4	127.6	159.5	135.5	76.9	44.1	55	150.8
26	7	1	14.8	2	M	1	CONTROL	225.4	15	47.3	10.7	141.7	3.3	119	539	165.5	95.9	70.4	152.6	117.9	13.8	101.6	43.2	155.2	116	116.9	82.3	39.8	58.4	210.7
27	7	1	16.4	2	M	1	CONTROL	282.3	71	45.1	8.4	188	4.4	92.5	511	188.8	105	80.2	155.4	138.5	19.1	73.5	49.6	181.3	131.9	92.1	105.9	48.3	76.1	216.7
28	7	1	6.9	1	F	1	CONTROL	253.4	56.7	48.7	8	183.8	3	85.5	581	170	104.9	77.2	153	109.5	19.7	57.5	47	187.6	172.2	158.9	100.8	44.8	74.2	205.7
29	7	1	2.5	2	M	2	CASE	232.3	37.4	45.6	11.4	137.2	3.9	128.1	441.1	187.5	95.5	55.6	131.3	100.1	15	61.7	44.5	181.3	139.9	104.2	73.6	55.9	57.6	200.6
30	7	1	6.2	1	F	1	CONTROL	329.6	51.1	49.9	14.4	113.4	2.5	122.3	569.6	210.7	112.8	65.3	134.8	127.7	16.7	83.8	43	122.3	151.6	136.6	99.8	33.3	50.5	207.6
31	7	1	2.5	1	F	2	CASE	258.2	52.6	54.8	13.3	120.4	2.9	157.6	635.1	217.1	131.8	50.4	121.6	108.3	14.8	78.4	47.7	146	163.3	156.1	90.4	30.1	52.9	164.4
32	7	1	15.2	1	F	1	CONTROL	235.2	56.5	45.6	7	127.5	3.1	79.5	509.1	245.9	108.8	43.7	93.8	92.3	14.2	73.4	37.7	144.2	133.7	102.2	77.4	20.4	53.4	160.9
33	7	1	10.5	1	F	2	CASE	325.5	41.3	45.8	10	129.5	3.5	100.3	455.3	191.9	106.8	51.4	128	109.4	16.2	92.6	43.2	158.1	133	106.5	93	45.9	56.9	184.8
34	7	1	2.6	1	F	1	CONTROL	206.8	44.9	43	12.8	100.2	3.7	124.5	392.6	172.3	125	51.8	124.4	120.5	13	72.5	46.9	111.7	116.5	74.7	74.5	52.3	54.9	191
35	8	1	6.8	2	M	1	CONTROL	254.7	31.9	49.8	8.8	118.4	5.2	107.7	506.3	208.4	108.3	58.2	142.3	135.5	15.4	86.2	47.4	136.4	138.4	71.5	79.2	38.2	67	192.3
36	8	1	4.3	1	F	2	CASE	226.9	47.7	39.6	8	100.7	3.2	104.7	516.3	201.1	101.1	58.2	126.2	87.5	13.4	53.7	41.8	103.9	125	117.6	56.7	36.6	52	161
37	8	1	10.5	1	F	1	CONTROL	304.9	14	63.4	10.1	137	2.7	107	529.2	233.9	114.3	59.9	135.7	125.8	20.2	102.1	47.8	147	150.7	61.1	110.2	43.1	81.3	200.8
38	8	1	16.5	1	F	1	CONTROL	309	26.1	45.5	7.9	137.2	4.2	99.1	555.1	266.7	106.9	52.8	118.2	132.3	15.1	99.3	41.7	149	152.5	68.2	112.4	34.1	60.2	182.9
39	8	1	2.2	1	F	2	CASE	481.5	49.7	76.3	19	133.9	4.2	161.9	783.3	206	122.6	42.1	85.4	97.7	18	74	35.6	166.7	217.6	180.1	64.9	12.2	47.7	127.9
40	8	1	4.1	1	F	2	CASE	210	39.3	44.4	14	107	5	214.7	394	183.7	99.2	55.9	129.2	101.7	15.6	65.2	40.8	115.5	142.2	183.6	78.9	29.9	51.3	177.8
41	8	1	5.1	1	F	2	CASE	265.8	45	40.1	10	141.2	3.8	99.5	561.9	142.8	111.2	51	114.6	87.5	16	43.5	42.6	169.9	108.4	160.6	82.3	38.4	60.4	185.1
42	8	1	8.9	2	M	1	CONTROL	201.6	54.1	48	6.8	104.4	3.3	88.2	567.4	184.2	98.9	61.8	136.9	95.9	14.9	48.2	52.8	110.1	126	171	74.1	25.4	57.2	202.4
43	8	1	11.2	2	M	2	CASE	329.1	36.8	45.2	12.2	119.4	6.4	129.9	545.3	230.4	107	51.7	114.9	93.1	15.8	69	46.3	132.1	111.2	173.5	73.5	30	61.8	172.6
44	8	1	17.9	1	F	1	CONTROL	243.1	36.5	56.7	9.4	152.4	3.3	101	493.6	157.4	99.9	36.2	133.2	99.8	13.3	63.9	44	156.2	118.4	222.6	72.9	30.8	51.8	179.6
45	8	1	3.4	1	F	1	CONTROL	296.3	31	49.7	10.2	136.2	3.4	116.5	485.7	332.9	98.8	57.1	136.8	120.8	12.7	101.3	43.6	145.8	164.4	106.4	93.2	35	61.5	209.2
46	8	1	9.7	1	F	2	CASE	308.8	22.1	53.2	9.8	157	4.5	133.4	518.4	176.4	115.9	60.5	133.9	119	12.7	79.5	41.8	193.9	142.3	101.9	86.4	26.7	68.5	207.6
47	8	1	13.5	2	M	1	CONTROL	282.7	36	54.7	10.2	145	4.7	114.1	494.4	199.5	101.4	57.2	114.5	103.4	10.6	80.3	41.1	152.5	110.1	105	83.9	16.4	56.6	194.7
48	8	1	16.9	2	M	1	CONTROL	298	39	45.8	10	139.3	3.8	128.7	523.6	204.7	95.9	66.4	134.1	111.6	13.8	81	48.6	143.7	113.4	95.6	80.3	25	52.5	166.2
49	8	1	6.8	2	M	2	CASE	258.3	35.1	44.7	15.5	113.2	7	222.2	277.1	214.9	105.3	51.8	126.8	126.4	15	67.3	43.5	126.8	142.4	156.7	113.5	48.9	64	192
50	8	1	7.2	1	F	2	CASE	286.3	61.7	42	14.6	134.9	5.5	185.3	352.9	259.8	92.8	57.8	134.4	123.5	18	60.4	43.9	154.7	108.2	156.2	95.7	40.2	63.7	184.5
51	8	1	13.5	1	F	1	CONTROL	337.2	63.8	44.8	22.8	139	5.1	401.5	140.7	254.4	112.9	76.4	151.8	144.2	15.2	91.6	45.5	146.7	194.4	161.6	127.7	44	75.5	217.5
52	8	1	13.2	2	M	1	CONTROL	288.1	71.5	36.7	14.7	153.7	5.1	170.4	432.3	207.7	105.6	71	145.1	111.7	13	56.2	47.5	155.8	125.4	77	101.9	39.1	78.5	208
53	8	1	17.8	1	F	2	CASE	313.7	40.1	50.3	17.5	129	5.2	179.9	462.6	212.8	127.5	60.4	143.1	127.3	15.4	88	49.5	153.4	169.1	78.6	136	41	56.2	176.3
54	8	1	14.4	2	M	1	CONTROL	300.8	73.4	44.9	27.8	234.2	13.8	155.1	467.7	254.6	84.8	76.8	158.7	146.9	18.7	87.9	48.9	196.6	142.3	195.4	73.2	33.5	69.8	211.1
55	8	1	2.7	1	F	2	CASE	400.4	13.5	58	10	148.2	3	147.2	460.1	330.2	126.8	49.6	128.9	118.4	14.2	96.8	45.1	176.6	178.1	86.1	97.7	63	72.7	190.6
56	8	1	2.8	1	F	2	CASE	253.3	18.9	47.3	7.9	109.9	3.9	110.3	477.2	232.9	102.9	46.6	115.4	111.6	11.4	73.4	42.2	120	146.6	74.1	82.5	48.3	56.1	177.9
57	8	1	3.4	1	F	2	CASE	389.2	26.1	54.9	12.5	122.1	3.5	131.1	603	256	116.5	33.6	93.6	108.3	13.5	107.6	39.6	138.2	169.6	106.5	81.9	40.7	93.1	166.6
58	8	1	5	2	M	2	CASE	202.7	32.8	37.3	14.1	108	7.3	210.3	326.1	186.3	117.8	85.4	186.5	94.8	7.8	62.5	45.3	114.7	112.9	89.6	64.6	21.7	49.6	227.3
59	8	1	7.5	1	F	1	CONTROL	146.3	36.2	31.5	6.8	90.5	4.5	70	563.5	107	93.9	39.2	84.1	74.7	8.2	29.7	39.9	83.3	81	58	42.5	22.8	42.7	150
60	8	1	2	1	F	1	CONTROL	416.8	51	67.9	8.7	162.9	2.6	100.2	512.3	292.4	124.5	61.2	127.1	140.9	20.2	86.5	43.3	167.2	183.1	75.1	107.3	47.2	83.6	197.1
61	8	1	2.5	1	F	2	CASE	230.9	40	36.5	7.8	106.8	8	92	443.1	151.7	88.7	42.7	91.8	86.9	9.7	42.3	34.9	116.2	126.6	73.8	67	28.2	54.7	160.7
62	8	1	4.5	1	F	2	CASE	173.1	31	33.3	4.4	94.5	5.9	58.3	553.1	166.6	96.7	40.5	82.9	94.1	14.4	39.4	32.5	81.6	100	47.5	55.7	46.1	46.3	154.5
63	8	1	15.7	1	F	1	CONTROL	261	56.8	44.2	4.3	157.4	7.5	69.5	637.7	136.6	97.8	58	125.7	127.4	16	59.5	35.8	164.7	131.3	39.8	86.9	32.9	53.1	210.8
64	8	1	15.3	2	M	1	CONTROL	304.1	49.6	48.2	4.7	218.8	6	55.8	524.8	214.6	83.7	53.9	106.5	126.9	18.4	58.9	39.1	231.1	111.8	38.7	164.3	35.8	65.2	199.1
65	1	1	13.7	2	M	1	CONTROL	214	86.4	29.9	4.8	103.5	9.6	90.5	545.1	122.5	89.5	61.9	119.8	92.9	12.6	32.3	42	126.2	61.2	30.6	63.1	43.6	39.7	196.8
66	8	1	2.6	1	F	2	CASE	255.5	27.4	46.5	11.1	134.8	4.5	124.5	486.4	189.8	116.5	49.1	115.1	104	11	54.1	37.5	154.6	155.5	82.2	77.4	26.2	43.5	196.7
67	8	1	4.9	1	F	2	CASE	471.1	11.9	59.4	16.3	157.2	4.6	235.7	313	261.6	122.2	53.7	129.2	112.6	12.5	80.3	47.5	182.5	159.4	103.4	120.3	32.4	58.5	189.2
68	8	1	13.1	2	M	1	CONTROL	323.3	44.2	49.5	8.1	116.5	3.3	92.2	524	222	110.8	55.6	121.2	123.8	16.8	82	44.3	123.4	134.9	97.3	82.1	47.9	69.4	181.8
69	8	1	16.1	1	F	1	CONTROL	284.8	19.4	67.2	9.4	153.3	4.9	124.8	557	184.1	112.7	49.6	116.8	121.2	12.2	112.6	42.9	158.6	140.1	75.3	94.1	46.6	59.7	174.2
70	8	1	18.3	1	F	#NULL!	AutoIm	305.9	11.3	50.4	13.9	131.9	6.7	128.2	443.3	194.6	117.4	54.4	134.8	135.7	13.9	85.1	53.2	147	138.7	94.4	57.4	39.1	68.6	197.1
71	8	1	12.1	2	M	1	CONTROL	383.7	63.7	61.6	46.2	193.7	6.9	243.8	408.1	265.7	115.2	87	176.3	157.6	20.5	103.1	75.9	199.5	157.7	178.3	69.8	44.2	77.1	249.9
72	8	1	8.1	2	M	1	CONTROL	223.5	34.5	45.9	7.3	129.9	7.4	95.6	514.3	209.5	100.2	41	93.3	92.8	13.2	77	38.6	140.1	128.8	63.9	79	41.7	68.7	162.4
73	8	1	12.3	1	F	1	CONTROL	289.6	47.3	38.7	5	271.8	6.9	69.2	569.7	232.4	96.7	47.5	92.4	126.4	16.5	72.6	37.7	266.4	152	61.5	116.2	39	68.5	182.5
74	8	1	14.4	1	F	1	CONTROL	357.3	48.8	47.4	5.4	212.1	7.3	80.1	600	161.7	101.1	59.9	128.4	129.9	17.2	84.5	40.6	210.7	120.8	58.5	103.6	52.3	69.7	210.4
75	8	1	18	1	F	1	CONTROL	275.6	29	68.5	9.2	179.1	5.9	89.8	503.6	195.6	117.2	46.4	133.3	122.9	18.3	98.4	48.8	183.6	146.6	82.2	101	37.7	72.6	182
76	8	1	16.2	2	M	1	CONTROL	327.2	39.1	56.5	7.7	169.5	5.6	100.4	436	188.4	110.1	72.6	153.5	151.1	17.8	90.4	53.4	172.2	137.7	34.4	77.3	51.8	66.6	205.8
77	8	1	3.2	1	F	2	CASE	273.3	33.8	46.8	6.9	135.4	7.5	100.7	512.6	282.2	81	39.2	86.2	118.5	14.2	49.4	33.2	146.8	126.6	49.4	122.3	40.9	50.8	171.8
78	8	1	6.1	2	M	1	CONTROL	201.2	53.4	38.6	4.9	127.4	6.1	52.9	495.4	161.6	90.8	46	102.1	114.6	12.6	35.6	35.8	143.2	111.6	47	82.4	41.3	66.5	197.5
79	8	1	7.4	2	M	1	CONTROL	159.5	39.1	42.8	5.7	100.2	4.6	56.7	469.3	169.4	83.3	47.7	109.2	92.6	14.3	57.9	40.6	99.2	116.9	60.5	80.6	36	65.4	174.3
80	1	1	13.4	1	F	1	CONTROL	273.8	34.7	48.8	9.6	147.9	8.6	121.1	500.4	224.3	100.9	58.8	129.3	148.6	13.5	87.8	44.2	177.7	165	63.8	122.2	32.3	60.3	200.9
81	1	1	15.1	1	F	#NULL!	AutoIm	328.4	35	55.9	8.3	133.9	4.9	118.1	531.7	174.3	106.3	54.2	129.5	118.1	12.5	95.6	36.3	138.2	135.5	64.6	117.4	31.7	56.4	178.3
82	1	1	3.3	2	M	1	CONTROL	417	47.1	54.7	4.9	182.3	9.4	86.3	580.4	338.4	111.1	48.2	95.7	103	21.1	62	37.1	197.8	197.2	125.4	162.3	25.7	58.8	152
83	1	1	17.8	2	M	1	CONTROL	348.5	38.7	58	7.6	129.1	5.1	109.8	582.5	146.7	123.6	81	172.4	122.4	14.9	73.7	59.4	146.9	128	86.2	102.4	37	55	226.8
84	1	1	9.1	1	F	2	CASE	284.5	33.3	40	4.7	129.6	9	75.8	474	194.5	83.7	37.6	81.1	94.4	12.3	67.8	32.8	134.4	115.8	62.7	78.3	39.9	53.6	153.2
85	1	1	13.3	2	M	2	CASE	286.8	59.8	35.4	5.8	151.2	8.4	104.5	520.8	169.1	83	54.8	109.6	106.4	14.4	42.8	42.2	180.1	107	29.7	86.2	22	60.2	189.7
86	1	1	13.7	1	F	1	CONTROL	274.9	62.7	37.6	7.8	123.1	6.8	93.5	544.4	177.2	93.2	51.1	114	122	12.7	52.5	42.1	132.7	133.9	81.6	84.2	30.3	61.2	183
87	1	1	5.1	1	F	2	CASE	280.2	34.4	42.1	9.8	116.3	8.8	97.2	587.9	309.6	93.8	40.5	85.6	89.8	14.4	79	33.3	121.4	188.6	98.6	77.6	37.1	69.7	151.8
88	1	1	10.6	1	F	1	CONTROL	289.2	61.1	44	5	195.2	9.2	115.2	562.9	204.2	94.3	50	113.2	119.3	15.5	63.5	37.9	216.3	131.8	73.6	132.2	38.1	63.8	187.2
89	1	1	15.8	1	F	1	CONTROL	279.2	28.5	42.2	16	135.3	7.2	118.4	414.1	189.9	116.2	73.6	152.5	124.5	15.9	71	51.7	142.4	154.7	92.8	119.7	50.4	49	201
90	1	1	12.1	1	F	1	CONTROL	305.3	23.9	48.1	10.7	116.8	6.1	123.9	472.3	222.4	100.1	67.9	139.1	124.1	15.7	84.2	48.4	134.5	174.4	89.4	111.4	46.6	78.8	197
91	1	1	11	1	F	1	CONTROL	352.5	43	51.3	7.9	191.7	4.4	115.5	559	264.4	107.2	54.2	124	103.6	14.7	76.5	41.9	200.6	163	75.9	109.4	33.5	61.1	181
92	1	1	14.1	1	F	1	CONTROL	300.3	16.2	55.2	9.8	127.3	5.9	132.2	521.8	178.5	132.6	68.6	133.4	108.4	14.6	90.4	51.2	146.6	133.5	98.3	94.3	43	75.8	197.5
93	1	1	10	2	M	#NULL!	TDC	271.8	48.3	61.6	11.1	109.8	4.6	112.2	527.5	204.4	99.8	49.1	116.4	112.2	12.3	85	39.7	116.1	138.8	85.2	88.2	29	58.4	169.2
94	1	1	2.7	1	F	2	CASE	265.8	8.9	48.9	6.1	112.2	4.2	93.7	401.1	218.5	101.9	46.7	98.7	66	15.4	71.4	37.3	115.2	146.1	65	71.4	36.6	47.6	160.9
95	1	1	5.2	1	F	2	CASE	334.5	25.4	66.7	7	124.4	3.5	108.7	422.4	255.8	117.3	59.5	141.3	121	18.4	82.3	49	140.4	167.8	96.1	96	64.1	75	194.5
96	1	1	13.8	1	F	1	CONTROL	280.1	32.9	53.3	5.8	132.6	6.9	89.5	538	195.2	104.3	54.3	120.2	119.2	16.2	94.3	43.2	150.5	164.1	70.1	154.3	37	49.4	171
97	1	1	5.5	1	F	2	CASE	258.3	16	47.8	15.4	111.8	8.1	120.2	462.6	215.7	103	42.4	107.9	111.2	10.1	99.3	39.5	118.6	163.3	66.6	63.9	24	54.2	176.2
98	1	1	2.2	2	M	2	CASE	369.3	24	67.3	10.7	130	5.6	130.3	464	231.7	119	55.8	118.3	116.7	15.1	111.3	44	155.7	157.1	82.4	79	24.7	69.7	205.7
99	1	1	9.3	1	F	2	CASE	253.3	29.7	46.9	10	122.6	5.1	137.9	491.1	207.2	105.1	48.2	121	115	11.1	93.7	37.8	132.6	137.9	78.9	64.9	30.9	50.7	169.1
100	1	1	3	1	F	2	CASE	284.3	28.6	55.2	10.4	144.7	4.5	111.7	460.2	183.1	105.5	56.8	136.5	116.3	16.8	105.6	50.7	176.5	152.4	72.4	65.9	57.7	67.9	192.7
101	1	1	9	1	F	1	CONTROL	314.7	47.7	62.5	9	119.7	3.6	166.5	482.3	231.6	118.5	53.2	128.5	125.3	16.3	94.6	52.5	137.2	167.1	75.7	99.5	38.7	76	171.9
102	1	1	10.3	1	F	1	CONTROL	246.3	38.6	52.4	8.5	100.1	4	112.4	509.2	229.8	88.3	47.7	106.7	110.6	10.9	82.4	40.5	105.1	146.3	53.8	75.6	23.2	48.8	160.1
103	1	1	9.5	2	M	1	CONTROL	205.2	29.3	42.6	7.5	118.9	5.7	121.9	469	163.6	94.1	81.1	154.1	87.7	9	67	39.6	122.1	114.7	80.6	54.6	25	43	203.6
104	1	1	14	2	M	1	CONTROL	283.4	32.9	48.3	9	145.4	5.3	114.6	502	221.4	95.6	61.6	129.4	124.6	16.1	72.6	44.1	147	148.1	70.1	110.4	39.1	50.1	204.6
105	1	1	14.9	1	F	1	CONTROL	274.8	27.2	45.9	7.4	113.2	6.3	81.7	395.9	129.7	112.3	47.3	123.4	113.1	12.2	66.5	42.6	114	91.1	116	62.5	33.8	33.7	167
106	1	1	10.7	2	M	1	CONTROL	290.8	32.7	47.1	10.4	105.6	4.2	107.4	535.2	183.6	111	81.3	153.8	101.8	17.1	70.5	52.9	124.1	146.9	94.1	90	32.9	68.5	195.4
107	1	1	9.9	2	M	2	CASE	386.6	32.8	67.7	7.3	154.6	5.9	100	451.7	297.7	106.1	77	160.3	133.2	20.9	109.4	52.7	186.1	160.2	96.1	149.1	59.4	73.4	222.7
108	1	1	9.8	1	F	2	CASE	351.1	18.4	52.7	8	149.7	4.9	132	472.1	260.7	106.5	56.5	141.4	116.2	15.7	126.7	48.3	185.3	142.7	89.2	77.2	40.5	73.8	194.2
109	1	1	9.9	2	M	2	CASE	337.8	28.1	65.6	9.1	138.9	7.4	104.4	490.8	230.3	114	40.8	111.3	150.4	15	97.8	48.7	159.5	127.2	77.6	88.8	51.1	73.5	167.9
110	1	1	9.9	1	F	2	CASE	290.4	32.8	48.4	7.3	126.6	5.9	115.1	449.9	180.6	99.6	60.8	137.6	125.2	15.5	93.5	69.8	153.2	105.4	94.2	67.8	54	76.5	193.6
111	1	1	9.6	1	F	2	CASE	608.9	47.1	79	9.9	222.1	4.7	131.3	753.1	252.9	130.8	55.6	134	144.7	32	158	68.2	295.7	162.4	114.3	123.6	46.5	78.6	158.1
112	1	1	9.5	1	F	2	CASE	302.7	30.3	52.9	10.5	157.4	5.4	121.7	525.3	203.6	98.6	55.1	137.4	141.5	17.7	121.4	51.5	191.2	153.7	98.8	93	28.6	87.9	192.2
113	1	1	9.8	1	F	2	CASE	214.1	26.4	40.7	10.1	110.9	4.3	154.4	437.8	192.5	91.3	48.1	131.4	108.1	10.7	83.1	44.6	113.8	113.8	92.4	41.1	43.3	59.9	173.9
114	1	1	9.6	1	F	2	CASE	364.2	28.1	51.4	12.6	150.2	4.2	125.7	424.7	203.7	100.5	80.8	156.5	123	18.3	99.3	52.4	157.5	156.3	93.7	75.1	60	98.4	224.6
115	1	1	9.5	1	F	2	CASE	295.3	36.5	54.1	7	120	5.4	124	531.1	211	103.5	43.5	116.1	109.7	13	89.6	43.3	130	127.7	78.5	81.4	44.4	51.8	173.2
116	2	1	14.9	1	F	1	CONTROL	342	38.8	76.5	8	179.7	7.8	98.3	582.6	189.2	120.8	62.4	129.7	117.6	21.1	88.2	48.3	200.2	180.5	80	136.4	58.4	62.5	182.4
117	2	1	3.1	1	F	2	CASE	334	26	51.1	9.6	117.6	5.3	154.3	426.7	248	104.9	55.6	119.4	130.3	15.4	99.6	44.6	139.9	151.6	76.6	52.8	34.3	56.8	175
118	2	1	2.5	1	F	2	CASE	277.8	24.9	46	7.5	132.9	5.9	130.8	518.4	249.5	95.1	39.2	83.7	82.9	17.1	84.3	38.4	166.2	144.9	61.3	59.5	43.9	73.2	146.4
119	2	1	15.3	2	M	1	CONTROL	258.4	23.3	54.9	5.2	195.4	7.2	90.2	516.6	158.2	103.2	66.1	147.1	133.3	18	90.7	45.3	207.2	124.6	62.2	86.4	41.5	57.1	212.3
120	2	1	4.8	2	M	1	CONTROL	258.1	26.4	45.6	4.5	100.8	6.7	58.9	570.3	169.3	99.3	51.3	124.3	111.2	14.4	61.4	42.2	98.3	124.4	59.3	72.7	52.7	59.8	183.7
121	2	1	4	1	F	2	CASE	197	27.9	40	4.9	99.2	6.2	61.5	503	106.6	84.5	65.1	131.5	81.9	11.7	42.5	41.9	100.3	87.3	52.9	50.2	40.3	51	196.6
122	2	1	12	1	F	1	CONTROL	242.8	31.4	51.3	2.8	131.6	6.1	51.6	596	284.8	104.1	35.3	125.9	128.6	16.6	71.7	46.7	136.1	165.5	41.2	114.1	40	56.3	195.4
123	2	1	3.2	1	F	2	CASE	371.4	34.7	57.7	10.9	116.4	4.3	125.3	536.4	220.3	108.9	56.6	135.9	160.6	16	103.7	50	139.5	155.7	164	51.9	35	64.7	188
124	2	1	4.5	1	F	1	CONTROL	262.3	59.9	53.5	8.9	126.4	4.3	124.8	436.8	234.4	105.4	60.3	150.4	122.8	12.1	84	49	129.7	144.4	103.5	51.5	39.5	59.6	196.6
125	2	1	11.7	2	M	1	CONTROL	274.4	8.7	54.3	7.2	135	4.8	119.1	479.2	301.6	94.7	54.5	124.9	101.4	13.3	103.3	55.8	138.5	174.4	66.9	89.3	45.9	53.7	182.2
126	2	1	2.4	2	M	2	CASE	230.6	20.3	43.6	10.2	86.3	5.1	144.7	332.4	198.4	95.7	43.2	103.5	96.6	9.3	72.1	42.1	83.4	100.2	75.9	39.7	36.7	60.3	164.8
127	2	1	2.7	1	F	2	CASE	248.5	24	46	12	100.2	5.7	163	409.6	250.8	100.6	62.5	132.4	94.7	16.1	82.5	45.8	113.7	114.8	131.5	56	30.1	61.8	192.6
128	2	1	9.5	1	F	2	CASE	355.5	20.5	54.8	7.2	117	6.6	138.9	439.4	264.2	107.2	41.1	96.5	96.8	17	90.2	45.9	130.3	136.4	90	79.4	46.8	61.9	155.4
129	2	1	9.3	1	F	2	CASE	286.5	22.9	49.8	8.6	108.5	8.4	214.2	329.5	207.1	101.1	51.2	122.4	117.4	11.4	87.7	40.3	116.6	132.6	96.4	70.8	58.6	60.8	183.5
130	2	1	15.5	2	M	1	CONTROL	340.2	36.5	62.3	11.6	185.8	9.2	213.6	498.1	290.3	113.5	78.8	140.7	126.1	21.5	91.5	46	192.8	181.7	159.3	95.8	24.5	58.2	166.5
131	2	1	16.5	1	F	1	CONTROL	324.9	9.4	61.9	7.3	169.1	9.6	90.4	587.8	295.1	119	71.8	158.8	140.9	17.2	117.5	49.9	169.9	197.7	93.7	111	41.8	50	183.1
132	2	1	3.9	2	M	2	CASE	291.1	24.2	51.3	9.2	104.2	5.8	133.6	437.4	215.9	105.6	50.6	122.9	105.5	14.6	78.7	42.7	110.4	155.5	94.1	79.3	49.4	58.1	194.2
133	2	1	5.7	2	M	2	CASE	230.8	34.5	50.4	13.1	164.6	8.9	132.6	396.9	206.6	111.4	45.4	114.8	102.2	11.5	76.1	43.5	248.3	138.6	122.1	61.6	25.6	41.1	176.3
134	2	1	7.4	2	M	2	CASE	267.6	22.1	53.1	6.5	114.8	7	119.9	488.3	224.7	105.6	53.6	135	102.8	12.9	116.1	43.1	143.3	125.8	93.1	63.7	40.8	64.1	188
135	2	1	15.4	1	F	1	CONTROL	260.6	30.1	59.4	11.7	101.3	5.9	93.1	378.9	144.5	114.8	57.6	135.2	125.7	18.1	53	57	114	112.3	112.2	74.7	62.9	42.5	182.3
136	2	1	16.4	2	M	1	CONTROL	344.1	36.3	64.1	8.3	249.6	8.1	108.8	589.5	290.7	110.4	71	151.9	154	15.2	126.7	49.1	239.4	146.4	97.8	86.8	36.3	74	196.6
137	2	1	15.5	2	M	1	CONTROL	277.7	32	46.3	8.9	131.3	6.6	85.7	430	221.6	91.3	81.5	164.2	110.7	12.6	63.4	51.8	130.9	112.6	101.9	74.3	32.2	64.5	204.6
138	2	1	1.7	2	M	2	CASE	193.4	29.7	41.2	7.5	104.2	7.9	100.2	450	182.6	83.8	48.2	106.1	91.4	12.6	74.3	40.3	107.8	132.1	55.7	87.7	53.2	55.4	178.4
139	2	1	5.7	2	M	1	CONTROL	214.6	21.1	47.9	3.8	103.9	7.4	40.3	501.2	201.4	93.3	42.6	106.2	116.5	12.5	62.2	45.2	110.5	106.5	43.7	80.6	46.9	50.5	180.8
140	2	1	17.3	1	F	1	CONTROL	285.7	41.2	49.1	4.4	113.5	8.4	51.6	469.9	176.5	97.1	44.1	118	110.9	17.8	52.5	49.7	119.7	99.8	78.6	65.9	61.1	56.7	162.8
141	2	1	11.9	2	M	1	CONTROL	259.6	14.2	60.2	10	155.2	6.8	117.2	475.7	198.3	103.6	74.6	155.2	120.8	12.4	104.5	54.5	161.6	149.2	76.8	78.8	45.8	69	215.3
142	2	1	13.6	2	M	1	CONTROL	483.8	47.8	60.7	4.9	142.9	7.1	70.8	565.4	319.7	92.6	53.3	96.2	101.9	22.6	79.2	43.8	178.3	143.2	58.9	113.8	52.2	48.7	156.2
143	2	1	12.6	1	F	1	CONTROL	303.6	29.4	45.7	6.5	167.2	8.3	93.5	517.3	208.1	81.6	49.5	130.7	125.5	8.7	87.2	43.7	162	127.1	73.7	75.5	20.2	62	210.1
144	2	1	4.5	1	F	2	CASE	177.6	33.2	36.7	4.3	99.1	7.5	65.6	407.7	129.9	88.6	62.9	135.6	90.5	11.9	36.6	40.3	110.5	89.4	67.7	51.5	36.5	51.1	210.1
145	2	1	5.7	2	M	1	CONTROL	221.5	22.2	45.5	5.2	105.3	9.5	63.4	597	186.7	89.1	34.3	84	92.8	12.2	71	35.8	110.4	122	49.3	66.7	54.4	54.2	154.1
146	2	1	10.2	1	F	2	CASE	425.1	43	42	5.1	217	10.2	81	615.4	135	101.5	54.3	111.5	120.5	18.2	71.2	42.4	295.4	102.1	62.1	77.4	54	70.5	195.1
147	2	1	16	1	F	1	CONTROL	405.8	26.4	75.4	16.6	117.1	12.6	196.2	620.2	278.3	120.6	52.3	123.2	149.9	18.5	149.8	51	142.1	161	118.5	112.6	35.5	56.1	169.7
148	2	1	4	1	F	2	CASE	304.3	17.7	41.7	5	119.9	8.1	91.8	413.3	261.4	87.4	41.1	94.1	100.8	16.4	91.7	35.5	144.9	121.6	61.5	85.6	61.7	54.8	172.1
149	2	1	4.3	2	M	2	CASE	258.3	25.4	47.9	7.4	110.2	5.5	104	460.1	228.9	94.7	40.3	100.3	89.9	18.4	97.4	39.8	124.1	128.7	64.2	73.7	46.5	59.2	151.8
150	2	1	15.6	2	M	1	CONTROL	253	42.5	48.8	5.9	137.3	7	84.3	491.1	237.5	94.3	59.6	142.6	154	14	90.2	45.9	142.7	160.4	60.2	109.7	43.1	59.2	207.7
151	2	1	15.6	1	F	1	CONTROL	315	46.1	59.8	10.3	146.4	6.2	105.3	533.7	221.5	101.6	73.3	134.9	130	15.5	78.6	39.6	147	139	115.3	137.6	40.3	63.7	177.1
152	2	1	6.6	2	M	1	CONTROL	229.8	27.7	43.5	5.3	108.9	8.2	80	450.8	222.3	82.7	36.8	82.5	105.3	12.7	66.3	32	109.2	133.3	61.5	95.1	42.3	45.1	177.7
153	2	1	14.2	2	M	1	CONTROL	344.3	61.1	60	4.5	222.5	10.2	94.9	640.3	189.5	118	86.6	182.7	145.1	27.7	65.5	62.6	226.2	134.1	63.5	126.3	41.8	122.1	251.6
154	2	1	17.2	1	F	1	CONTROL	313.9	38.3	72.6	8.7	136.4	8.2	104.9	588.4	156.1	147.8	77.4	179.1	145.5	17.5	64.6	55.9	133.3	153	101.2	103.7	34.9	55.2	234.6
155	2	1	9	1	F	1	CONTROL	288.3	24.8	59.8	9.5	95.4	7	123.1	539.3	216.8	126.6	61.2	141.4	136.8	15.4	95.7	44.9	102.7	168.6	83	107.2	54.3	70.1	206.5
156	2	1	1.8	2	M	2	CASE	233.2	23.8	40.2	6.3	109.3	8.4	78.1	474.7	149.9	84.1	33	72.8	86.7	11.8	49.5	34.6	127.5	103.9	51.6	47.8	29.9	49.7	139
157	2	1	4.3	2	M	2	CASE	282.6	59.3	53.1	6.5	124.9	15.9	85.1	599.7	271.8	111.9	54.7	138.6	114.6	19.5	78.5	55.2	147.5	149.6	64.1	89.5	72.1	82	207.2
158	3	1	1.6	1	F	2	CASE	376.7	28.3	48.5	7.8	171.8	7.1	101.5	553	211.4	101.5	44.7	80.5	89	15	58.4	32.2	234.8	146.4	53.7	68.3	36.3	69.3	169.2
159	3	1	13.8	1	F	1	CONTROL	403.9	50.2	61	10.1	237.2	9.4	111.4	452.7	283.1	106.1	73.7	148	119.4	17.6	107.5	48	232.3	154.3	88.9	77.8	55	69	194.7
160	3	1	14.5	1	F	1	CONTROL	341.1	45.7	55.3	7.8	222.4	7.3	108.8	504.2	215.3	114.7	71.9	155.8	135.4	15.4	91.5	51.3	214.5	119.9	82.9	90	47.7	68.5	218.4
161	3	1	16.5	1	F	1	CONTROL	315.9	47.3	61.9	6.9	122.5	6.5	79	537.1	243.9	98.4	60.7	135.4	88.9	19.2	112.8	47.7	147.9	135.2	114	49.7	47.1	66.6	181.2
162	3	1	10.7	2	M	#NULL!	TDC	250.6	44.3	40.8	9.4	121.6	11.7	121.2	534.8	207	90.5	68.2	134.6	111	15.5	72.1	40.2	124.1	121.8	74.2	80.5	34.1	53.9	179.3
163	3	1	3.6	2	M	2	CASE	362.4	39.1	78.6	5.7	137.9	14.2	98.2	621	237	123.5	63.7	136.7	131.6	22.3	106.2	56.5	188.8	161.1	61.7	118.4	79	96.2	210.2
164	3	1	11.4	1	F	1	CONTROL	225.6	64	59.8	6.7	131.2	11.4	101	556.9	238	124.1	59.9	135.8	120.4	17.6	68.1	52.7	132.6	157.3	66.8	79.2	40.7	70.2	196.2
165	3	1	10.6	1	F	1	CONTROL	229.7	29.7	48.8	6.4	106.3	8.4	92.3	452.9	225.3	101.5	63.7	130.8	130.9	13.9	82.8	49.2	122.8	145.2	90.6	73.8	54.8	62.1	201.5
166	3	1	8.3	1	F	2	CASE	457.4	31.7	68.5	8.3	142.9	9.3	135	524.4	394.9	110.5	73.3	157.5	142.3	22.6	148.3	54.2	177.9	163.6	126.1	93.5	68.8	76.4	212
167	3	1	15.2	1	F	1	CONTROL	367	43.9	61.5	7.5	194.6	8.7	99.1	663.7	225.1	131.1	76	159.6	155.5	16.1	116.7	52.7	206.2	150.4	109.8	96.3	43.4	76.4	221.8
168	3	1	7.4	1	F	1	CONTROL	343	55	60.7	10.2	122.6	8.7	143.1	648.8	297.4	129.6	81.7	164.9	133.7	21	82.7	62.6	130.4	150.5	116.6	89.1	51.6	74.7	213.2
169	3	1	6.8	1	F	1	CONTROL	210.5	38.8	57.9	3.6	87.9	8.1	60	541.8	210.6	103.8	45.5	110.5	115.4	20.9	75	46.5	99.4	156.2	65.1	107	48	71.1	174.8
170	3	1	1.4	2	M	1	CONTROL	240.7	18.1	47.7	4.9	200.9	14.2	68.7	573	184.1	95.6	61.9	127.4	99.5	15.2	58.1	45.9	204.4	119.8	60	102	29.7	50.7	193.2
171	3	1	11.2	1	F	2	CASE	420.7	41.8	57	4.1	175.1	14.5	61.8	628.1	210.4	112.4	62.6	136.3	104	22.1	65.3	49.8	237.7	121.9	79.8	100.1	64.2	105.9	203.6
172	3	1	13.9	1	F	1	CONTROL	369.9	58.7	70.8	8	207.6	9	99.1	571	248.3	120.3	70.8	152.1	147.6	22.9	103.2	58.7	199.8	142.1	94.5	118.5	58.8	80.3	205.8
173	3	1	6.2	2	M	1	CONTROL	343.4	47	52.7	3.7	108.5	17.7	53	570.7	261.6	95.9	44.4	92.9	133.8	20.3	69.6	43.2	115.2	128.1	43.3	83.1	50.3	64.3	174.9
174	3	1	17.4	1	F	2	CASE	576.5	88.2	126.7	21.2	241.7	16.1	154.6	865.1	343	223.6	119.1	245.8	266	42.1	182.6	100.7	370.7	258.6	210	155.7	86.4	90	299.9
175	3	2	3.3	1	F	2	CASE	290.2	19.4	58.4	5.7	116	17.6	78	622.8	194.3	114	73.1	166.9	157.1	20.3	90.1	52.9	146.1	154.3	82.4	92.3	47.6	68.4	248.9
176	3	2	7.9	2	M	1	CONTROL	172.1	22.8	44.5	5.3	134.8	21.4	77.2	527.3	186	86.4	54.8	117.9	119.7	12.1	63.4	41.5	138.9	124.3	73.8	81.2	44.8	49.4	202.5
177	3	2	11.4	1	F	1	CONTROL	404.5	39.5	70.7	8.7	125.3	19.5	79.1	593.3	222.2	95.6	67	112.8	128.4	19	72.5	39.8	141.4	169.4	88.1	148.6	56.2	86.3	201.5
178	3	2	9.1	1	F	2	CASE	364.9	27.9	60.8	7.3	144	19.1	98.5	526.3	215.9	120.7	64.3	154.8	159.3	23.4	122.9	56.3	198.6	120.5	76.2	68.1	57.3	99.3	215.1
179	3	2	17.3	1	F	1	CONTROL	354.2	53.1	65.4	9.5	113.7	19	98.5	575	160	134.6	67.9	154.8	160.2	21.4	76.6	55.3	127.8	116.4	94.6	103.1	44.3	70.1	198.8
180	3	2	2.8	1	F	2	CASE	194.3	23.6	57.9	7.5	105.3	17.6	91.1	570.3	178	96.3	49.5	117.9	100.6	13.1	61.5	42.9	124.4	120.4	54.7	62.9	38.6	49.4	184
181	3	2	3.9	2	M	2	CASE	160.7	24.6	39	3.8	103.2	17.1	62	538.2	120.6	91.6	40	97.2	106.3	11.5	53.5	40.2	119.5	91.4	64.9	49.3	54.8	48.7	171.3
182	3	2	7	1	F	2	CASE	210.1	33	39.5	4.5	91	18.7	61.5	507.8	163	87.7	48.1	109.4	96.1	14.3	45.9	44	93.5	115.4	56.6	65.5	66.9	49.6	190.6
183	3	2	14.4	1	F	1	CONTROL	302.3	18.8	54.2	6.3	191.4	14.9	66.4	500.6	171	106	55.9	139.5	150.9	18.5	111.1	51.9	208.9	143.3	72.6	87.4	67	80.2	223.8
184	3	2	14.5	2	M	1	CONTROL	364	9.8	72.2	8.7	195.8	20.8	93.3	603	235.8	106.5	58.2	148.5	140.1	23.1	123.8	58.6	219.8	133.1	88	96.9	64.4	82	193.4
185	3	2	9.8	2	M	2	CASE	210.7	45	40.7	2.8	93.7	27.1	36.5	542.5	157	83	53.1	114.2	115.3	17	54.7	41.2	107	79.8	38.6	61.9	53	60.1	185.4
186	3	2	6.6	1	F	2	CASE	203.3	44.8	39.7	4.4	105	20.8	59.2	536.5	187	85.6	32.5	78	104.3	14	40.8	38.5	125.6	131.9	48.9	68.5	35.7	54.4	140.7
187	3	2	7.5	1	F	1	CONTROL	356.6	19.7	70.1	12.5	131	25.9	106.4	723.1	272	151.5	63.5	146.3	138.7	19.1	113.2	57.4	166.4	165.9	95.2	97.1	37	80.5	204.4
188	3	2	15.2	1	F	1	CONTROL	324.4	44.6	59.1	10.1	308.7	23.1	97.7	548.9	186.5	119.7	65.3	157.7	174.8	17.1	104.3	59.1	321.8	127.4	87.2	97.4	59.5	80.8	221.1
189	3	2	2.9	2	M	2	CASE	216.4	26.2	42.8	5.7	102.5	17.9	76.8	546.8	156.3	95.8	35.4	80.5	85.6	11.6	39.3	31.6	121.1	124.2	66.9	64.2	38.6	39.1	165.6
190	3	2	3	2	M	2	CASE	192.5	24.8	39.9	3.8	103.4	19.1	48.2	482.9	162.5	88.3	40.8	87.9	82.8	13	43.7	37.7	120.9	116.1	49.1	81.3	52.6	41.8	171.9
191	3	2	3.7	1	F	2	CASE	254.6	26.9	52.3	7.7	115.5	15.5	79.6	581.7	180.2	99.2	51.4	109.6	102.5	14.8	78.3	41.8	153.3	130.8	62.8	54.7	42.2	65.3	179.4
192	3	2	6.1	2	M	2	CASE	215.3	24.6	49.1	4	98.4	20.1	54.5	551.1	186.4	95.9	44.5	102.6	97.9	14.4	54.4	40.1	106.3	112.4	57.2	57	62.7	60.8	181.1
193	3	2	8.6	1	F	2	CASE	315.4	31.1	51.1	3.3	130.3	23.3	41.2	484.7	192.8	101.1	50.9	126.3	126.2	18.2	82.3	42.2	180.7	127.1	70	95.2	48.6	61.9	198.2
194	3	2	10.3	2	M	1	CONTROL	222.5	10.7	42.2	2.7	106.9	14.1	37.3	467.9	203.4	78.6	40.6	96.3	91.2	14.7	54.3	43.2	116.1	117.2	49.2	65.6	49.8	59	135.2
195	3	2	13.6	2	M	2	CASE	303.4	49.2	48.4	4.3	128.7	33.1	65.2	586.7	234.3	94.5	50.1	112.4	135.1	17.7	68.9	39.8	153.7	149	73.5	102.7	38.5	48.5	195.1
196	3	2	15.2	2	M	1	CONTROL	368.6	51	50.7	3.6	150.6	17.9	40	583.2	191.5	98.9	66.7	134.7	115.2	18.2	65.2	51.5	171.4	111.8	51.5	86.9	42.9	69.4	214.9
197	3	2	2.7	1	F	2	CASE	220.8	30.9	46.4	4.2	108.7	18.7	51.4	670.5	157.4	103.4	55.7	131.5	118.6	14.4	47.7	43.8	127.9	117.3	53.7	63.1	33.3	55.6	201.3
198	3	2	3.5	2	M	1	CONTROL	181.6	25.2	44.3	3.4	70.4	16.9	49	502.8	145.2	80.4	45.1	97.2	92.4	9.5	44.2	37.6	83.4	113.6	45.9	49.5	37.2	52.6	158.6
199	3	2	3.9	2	M	2	CASE	209.1	53.2	48.2	4.4	109.3	14.8	50.5	617.6	223.3	94.4	43.6	95.4	103.2	15.6	41.8	34.4	118.9	142.1	48.6	85.2	34.2	50.6	182.5
200	3	2	4.8	1	F	1	CONTROL	334.2	73.1	57.9	7.8	161.6	23.9	88.9	566	311.5	102.7	44.5	103.7	140.7	16.5	71	41	168.9	152.2	69.8	86	37.7	69.1	178.7
201	4	2	11	1	F	1	CONTROL	245.9	13.5	46.6	5.4	112	21.6	70.8	507	160.9	92.4	51.3	108.9	107.8	14.5	54.4	39.7	124.2	101.1	55.9	82.2	49	54.1	186.1
202	4	2	14.1	2	M	2	CASE	210.4	51.5	40.9	4.6	117.2	25.3	55.6	510.3	178.5	88.6	52	128	106.3	14.4	48.7	38.9	140.8	106	47.1	78.1	37.9	47.6	184.6
203	4	2	17.5	2	M	1	CONTROL	238.4	28.2	44.9	4.9	178.5	29.9	87.1	601.1	134	111	59.4	139.5	133.3	16.6	69.2	50.7	198	109.4	47	87.3	54.7	55	205.4
204	4	2	3.8	1	F	2	CASE	246.4	36	46	3.9	117.5	28.1	59.1	497.5	251.2	116	44.9	110	115.4	15.7	51.8	42.5	131.7	118.5	52.4	86.2	50	53.9	194.4
205	4	2	9.5	1	F	2	CASE	297.7	36.8	50	3.7	118.5	23.3	59.1	562.6	239.9	89	44.3	102.8	115.4	18.6	89.7	40.6	140.1	129.2	55.7	108.2	54.4	72.4	173
206	4	2	10.6	1	F	2	CASE	256.9	30.4	42.2	4.8	96.4	24.9	64.7	487.3	146	86.3	46.6	101.9	115.8	14.5	60	39.7	99.6	115.7	55.1	84	59.4	58.8	181
207	4	2	15.4	2	M	1	CONTROL	266.9	33.1	55.9	5.1	162	24.7	71.2	562.6	193.6	109.6	68	152.6	125.6	19.3	72.8	60.4	178.1	127	44.6	103	60.8	70.6	224.3
208	4	2	14	1	F	1	CONTROL	249.7	37.6	44.7	4.1	109.4	24.2	48.5	530.7	130.2	87.1	53.7	114.2	125.4	15.3	50.2	40.3	122.9	108.2	48.2	76.9	35.1	47.9	183.1
209	4	2	6.8	1	F	2	CASE	161	20.6	28.3	2.6	102.6	13	43	380.9	122.9	69.7	31.4	77	77.6	12.6	36.4	33.6	107.8	69.7	41.6	59.7	38	41.9	132.8
210	4	2	5	1	F	2	CASE	277.2	48.4	43.9	5.3	109.1	16.8	85.1	553.5	188.9	92.6	40	99.5	104.9	17.4	56.3	40.3	130	137.3	75.8	87.3	43.6	58.1	160.6
211	4	2	11.5	2	M	1	CONTROL	227.8	15.9	51.5	4.4	96.7	26.8	89.7	781.2	179.3	80	34.1	68.8	108.6	14.5	64.1	31.8	135.8	110.1	49.6	79.6	31.5	65.9	125.8
212	6	2	3	1	F	2	CASE	246.9	36.7	44.5	6.8	110.1	17.1	72.8	580.8	221.8	84.8	35	68	95.3	16.6	40.6	31.3	118.4	129.5	60.3	68.4	27.8	51.5	131.1
213	4	2	10.3	1	F	2	CASE	267.8	55.2	42.6	3	147.6	28.2	52.7	563.6	185.4	85.8	48.1	108.5	126.1	15.2	51.8	46	202.2	116.2	68.1	98.1	48	62.1	186.9
214	4	2	3.7	1	F	2	CASE	219.6	25.1	43.1	7.3	98.4	18.2	115.3	425.8	163.7	97.2	47.6	110	104.3	14.1	52.7	44.6	117.2	102.7	73.4	75	45.6	59.9	186.4
215	4	2	2.8	1	F	2	CASE	287.3	30.1	38.6	5.7	107.8	19.7	78	447	180.6	85.7	33.1	92.6	94.5	14.8	62	37.8	130.2	103.5	45.6	63.1	35.3	56.6	172.2
216	4	2	9.7	2	M	2	CASE	258.6	48.4	53.3	5.5	119.1	29.9	94.3	554.7	209.4	97.2	55.6	120.9	128.8	18.6	68.5	45.3	145.2	138.3	74.8	104.1	59.4	60.1	191.9
217	4	2	6	1	F	2	CASE	174.4	20.7	44.1	6.3	117.3	21	99.7	415.6	181.5	84.3	69.9	147.5	99.4	13.9	64.8	41.3	143	94.3	58.3	73.1	51	41.3	225.7
218	4	2	15.6	1	F	1	CONTROL	312.1	23.7	47.3	4.8	136.1	29	96.7	409.9	182.7	92.6	43.2	108.1	142.9	15.7	68.1	41.8	156.6	111.1	63.6	105.6	44.8	54.2	184.1
219	6	2	17.9	2	M	1	CONTROL	324.9	38.1	46.6	3.3	168.8	21.1	37.7	524.6	118	95.8	111.7	208	120.8	19.7	55.7	50.4	174.8	97.4	72.2	77.4	38.1	63.1	263
220	4	2	2.8	2	M	2	CASE	246	44.4	48	7.1	100.7	18.9	83.1	554.4	248.5	88.3	32.6	76.3	101.1	15.4	38.9	36.3	107.4	125.1	44.3	57.4	15.4	62	120.1
221	4	2	7	1	F	2	CASE	196.7	22.2	40.3	4.5	127	21.1	60.6	491.2	200.3	90.7	37.3	94.9	94.6	13.8	70.1	36.3	153.5	137.5	41.6	79	33.6	80.1	162.2
222	4	2	2.3	2	M	1	CONTROL	163.5	23.4	57.6	5.1	92.3	16.2	62.3	480.7	221.2	74.9	32.4	70.3	82	9.4	47.2	33.9	116	117.6	52.8	58.5	43	46.6	132.4
223	4	2	9.5	1	F	2	CASE	281.5	39.9	62.3	4.3	107	28.3	63	597	204.9	93	42.5	88.3	110.7	17.7	59.5	40.3	125.8	141.9	64.7	122.6	51.2	51.2	154.8
224	4	2	14.3	1	F	1	CONTROL	306.9	50.9	51.4	2.5	105	29	27.3	612.6	174.2	104	36.7	96.9	112.8	14.7	57.8	34.4	122.1	130.1	55.3	87.4	41.5	57.4	154.1
225	4	2	6.1	2	M	2	CASE	290.2	35.8	51.4	5	114.1	17.5	99.6	448.6	225.3	94.9	41.3	97.9	116.4	16.4	65.5	39.8	127.5	125.9	61.8	111.4	51	65.8	188.6
226	4	2	6.9	2	M	2	CASE	212.5	24.9	42.7	3.9	111	19.8	72.7	405.3	191.7	89.8	33.2	92.5	110.1	12.7	48.6	34.9	125.4	108.7	51	78.8	46.4	52.6	173
227	4	2	10.1	1	F	2	CASE	215.9	26.8	46.9	2.6	109.9	19	48.1	593.3	187.5	83.5	35.7	81.6	86.8	13.1	74.1	37.2	125.9	121.5	66.2	67.8	38.4	48.7	149.9
228	4	2	15.7	1	F	2	CASE	359.3	49.5	71.8	4.3	149.2	21.7	50.7	671.7	377.2	99.8	45.7	103.4	82.1	21.3	76.2	46.1	198.4	189.7	49.6	107.6	50.3	70.9	154
229	4	2	16	1	F	1	CONTROL	272.7	51.7	70.5	5.1	127.3	28.1	72	565.9	175.9	104.6	48.8	120.1	138.8	18	61.1	41.4	149.2	149.8	50.1	95.7	61.3	48.9	189.7
230	4	2	2.5	1	F	2	CASE	217.4	17.7	43.5	6.6	127.8	7.9	73.8	494.6	174.7	108.6	46.3	106.6	84.4	12	52.3	34.9	180.1	120.7	43	97.7	27.6	43.5	212.4
231	4	2	2.6	1	F	2	CASE	227.2	41.6	50.7	8.9	116.5	14.5	143.6	413.6	208.4	94.9	38.8	90.2	106.5	14.9	54.2	40.4	148	129.2	83	72.5	28.7	45.3	156
232	4	2	3.7	1	F	2	CASE	201.6	36.5	41.7	4.6	97.2	19.2	57.2	652.2	148.9	88.8	40.7	100.4	112.9	14	56	38.5	105.4	114.9	54.7	71.1	44.3	59.2	167.1
233	4	2	5.8	2	M	2	CASE	278.7	66.6	46.4	4.4	126.7	23.1	68	546.2	200.9	98.2	40.3	97.3	113.8	14.8	54.6	39.7	158.9	104.7	45.1	78.5	46.4	58.8	167.5
234	4	2	6.6	1	F	2	CASE	233.2	33.2	54.2	4.7	120.4	20.8	65.3	518.1	202	90.3	48.8	111.2	122	16.2	80.6	39.5	150.7	167.1	48.6	101.9	50.6	58.5	186.1
235	4	2	15.2	1	F	#NULL!	TDC	198.8	44.6	36	2.9	82.8	17.5	46.6	519.2	205.8	84.8	36.1	77.7	127.6	13.3	44.5	35	94.5	108.2	39.5	61	41.9	29.8	131.3
236	4	2	2.7	1	F	2	CASE	220.6	30.5	36.8	5	96.1	22.4	86.5	468.4	209.9	70.9	54.5	113.1	122.1	12.6	47.7	36.3	101.2	118.9	71	70.6	39.4	51.3	194.4
237	4	2	5.9	2	M	2	CASE	222.5	30.6	40.4	7.7	101.7	19	99.4	528.7	157.2	93.3	36.1	85.3	96.6	13.5	49.1	36	109.7	105.1	46.6	78.4	48	44	174.8
238	4	2	6.6	2	M	1	CONTROL	380	43.9	53.7	4.4	139.9	25.4	61.7	489.3	223.2	84.6	41.1	84.7	116.1	17.3	57.8	36.6	162.4	150.8	55.1	95.2	49.1	52.4	162.7
239	4	2	15.4	1	F	1	CONTROL	250.5	50.5	49.4	3	90.5	30	36.8	524.7	169.8	94.1	55.1	132	135	17.7	48.3	52.6	106.1	139.6	52.9	73.9	42.7	59.4	198.6
240	4	2	9.8	1	F	2	CASE	252.9	39.7	48.8	3.9	103.7	19.1	68.8	500.6	144.9	90.7	54.4	127.3	122.5	15.5	59	45	112.8	101.6	69	67.6	47.6	59.5	189.9
241	4	2	16.9	1	F	2	CASE	301	56.8	50.8	4.7	136.4	21.1	56.6	536.8	178.3	119.4	73.5	156.9	171.8	25	49.1	62.3	167.1	123.9	65.8	101	76.3	74.6	241.3
242	4	2	10.6	1	F	1	CONTROL	294.3	62.2	43.8	4.3	168.1	24.5	66.2	531.8	204.8	92.5	57.8	117.9	137.1	20.8	63.7	41.6	188.1	140	56.1	140.2	51.4	60.2	197.9
243	4	2	7.2	2	M	2	CASE	212.5	30.4	65.1	6	112.1	16.8	73.3	528.3	149.9	90	59.6	127.8	112.8	14.5	55.7	41.4	126	143.5	48.7	89.5	41.3	65.3	176
244	5	2	9.5	1	F	2	CASE	336.8	37.1	55.5	4.4	144.5	19.2	53.1	604.4	277	89.5	49.9	116.3	146.8	17.7	127.8	43.5	185.7	161.4	61.5	107.5	60.7	62.2	186.7
245	5	2	14.1	1	F	2	CASE	284.3	33.4	52.8	6.2	149.2	22.2	62.4	583.5	202.9	99.4	43.9	116.5	130.1	16.5	85.1	46	207.3	120.9	72.1	122.9	33.7	58.7	190.9
246	5	2	9.8	2	M	2	CASE	204.9	43.4	45.4	3	99.1	23.2	37.1	548.8	165	115	39.4	99.5	113.5	14.8	46.1	38.7	106.2	105	54.6	98.8	44.3	46.1	162.2
247	5	2	16.7	1	F	1	CONTROL	261.5	61.1	62.2	4.1	151	23.1	47.8	573.7	185.3	93.1	43.2	97.1	134.7	17.4	57	33.9	169.5	158.9	60.6	132.6	46.1	44.5	172.9
248	5	2	16.7	1	F	1	CONTROL	288.8	38.1	51.6	3.2	133.3	22.4	33.5	604.7	194.8	110.5	52	124.4	127.9	15	59.9	52.9	153.1	160	39.3	104.3	52.9	51.5	217.6
249	5	2	11.4	2	M	1	CONTROL	326.7	12.2	48.1	5.1	163	17.4	61.8	532.4	195.1	99.3	64.7	128.3	109.9	16.2	80	42.3	184.5	118	52.3	99.4	59.2	70.5	213.6
250	5	2	2.4	1	F	2	CASE	181	14.7	41.8	5.5	94.5	15.5	65.1	484.4	172.6	102.2	46	107.4	108.4	15	63.2	42.4	97.1	131.4	52.5	89.2	61.6	47.9	215.9
251	5	2	3.9	1	F	2	CASE	232.9	34	56.1	6	105.1	18	70.6	477.7	193.6	106.5	45.8	113.5	121.9	16.5	53.3	42.1	116.3	159.5	58	118.5	57.7	55.4	211.4
252	5	2	9.2	1	F	2	CASE	235.1	31.6	57.8	4.6	156.7	18.2	39.7	570.7	218.1	100.9	36.7	88.5	112.9	16.9	85.4	36.5	206.6	130.9	58.9	93.4	28.3	49.9	165.9
253	5	2	16	2	M	1	CONTROL	341	76.5	65.6	6.4	174.4	31.2	59.9	600.2	202.2	94	74	136.6	137.9	20.3	76.3	53.5	198.4	166.7	71.9	97.9	56.2	62.4	199
254	5	2	14	1	F	1	CONTROL	211	39.5	46.2	3	108.9	22	43.1	539.3	167.5	100.5	36.1	92.7	104.2	13.8	44.5	35.4	125.1	111.5	48.4	67.1	43.5	41.5	166.9
255	5	2	16.4	1	F	2	CASE	281.9	77.2	59.9	3.1	112.6	24.7	33	628.1	281.8	91.9	55.2	119.7	141.4	24	59	47	129.6	131.7	65.3	148.5	53.4	60.2	180.5
256	5	2	2.7	1	F	2	CASE	207.3	34.4	39	5.7	122.9	17.4	79.4	500	187.8	98.2	41.2	93	126.3	13.7	50.1	38.7	146.7	122	60.4	69.3	47	65.4	164.8
257	5	2	7.2	1	F	2	CASE	147.6	22.4	32.7	4	116.7	14.5	58.8	309.6	124.2	91.4	44.3	100.1	108.9	12.3	48	28.9	107.7	94.3	45	87.4	31.3	31.6	158.7
258	5	2	9.7	2	M	2	CASE	256.9	55	48.6	5.4	137	14.3	58.5	548.5	254.4	111.6	47.6	112.3	133.3	19.3	89	48.3	145.7	153.8	60.3	99.4	66.7	60.9	176.8
259	5	2	7.8	1	F	1	CONTROL	279.4	21.9	54.7	5.9	111.4	16.5	69.8	598.2	205	101.5	50.8	103.4	113.6	16.9	92.7	42.9	139.6	137	56.1	91.5	48.7	54.5	182.7
260	5	2	9.8	2	M	2	CASE	204.7	43.2	42.2	6.7	98.8	19.6	64.2	495.4	204	91.9	44.3	114.9	110.3	14.6	61.6	44.3	88.6	108.6	71.5	96.7	48.4	52.9	170.5
261	5	2	17.7	1	F	1	CONTROL	214.3	29.9	38.4	3.6	109.1	24.2	53.6	436.5	182.7	76	43.9	81.8	115.7	14.3	41.2	34.5	121.1	111.7	48	54.2	24.2	47.5	132.1
262	5	2	17	2	M	1	CONTROL	218.6	35.6	39.5	4.4	105.1	19.7	62.9	442.2	186.8	82.5	44.9	115.5	102.5	17.3	38	69.5	118.4	98.5	28.2	59.3	32.1	41.8	155
263	5	2	7.5	2	M	2	CASE	198.5	38.3	55.1	5.4	118.8	18.2	85	424.2	230.5	93.6	38.7	101.6	124.4	14.3	57.6	37.6	130.7	158.5	59.7	121.9	43.8	67.5	191.8
264	5	2	5.3	1	F	2	CASE	196.6	21.5	42.1	4.2	113.5	13.8	78	403.3	169.7	91.8	34.6	91.1	96.6	12.4	54.6	34.9	123.6	107	59.6	78.9	49.2	36.5	176.9
265	5	2	3.6	1	F	2	CASE	212.8	30.7	51.7	5.3	103.4	17.1	79.5	439.2	193.2	94.3	39	87.7	120	13.9	64.6	39.5	105.8	136.5	44.8	90.7	56.1	49.7	174
266	5	2	14	2	M	1	CONTROL	317.6	41.7	49.9	4.1	165.4	17.6	67.6	487.7	184	93.9	58.6	135.6	116.5	18	58	51.6	197.3	123.2	52.2	82.5	48.7	88.1	211
267	5	2	9.9	2	M	2	CASE	301.3	49.1	47.5	4.5	133.4	18.1	52.2	506.6	218.2	80.3	45.4	102.6	112.8	16.5	64.3	46.1	158.3	117.4	55.8	81	55	76.4	170.2
268	5	2	10.1	2	M	2	CASE	254.9	38.6	44.7	4.7	153.9	22.4	56.8	459.7	218.8	92.2	43.4	96.4	124.7	17.3	59.3	37.7	209.8	126.6	43.8	93.3	55.2	69.3	178.8
269	5	2	17	1	F	1	CONTROL	310.8	48.6	45.3	4.8	178.8	29.4	62.8	606.4	185.5	104	41.1	98.7	135.2	17.3	65.2	42.1	199.4	118.1	52.3	97.8	39.4	59.4	177.8
270	5	2	10	2	M	2	CASE	190.3	19.3	41.3	3.6	108.6	21.4	51.9	494.1	168.4	88.6	42.7	105.2	111.8	13.9	66.2	40.3	119	108.6	55.3	76.7	55.1	56.9	181.3
271	5	2	17.4	1	F	1	CONTROL	250	29.6	52.7	4.5	86.6	19.3	58.2	545.9	157.9	113.2	56.1	131.7	135	18.4	70.8	42.7	108	136.2	40.4	101.8	37.7	52.2	188.4
272	5	2	3.6	1	F	1	CONTROL	212.2	31.6	44.7	5.1	87.7	15.7	83.5	520.9	154.5	92.1	42.4	96.4	103.6	17.6	55.5	39.6	106.1	113.5	51.2	70.6	45.2	54	174.9
273	5	2	16	1	F	1	CONTROL	339.7	25.6	55.2	2.9	104.2	23.3	41.6	451.4	185.9	102	43.8	102.4	126.1	21.4	55.2	49.7	121.2	127.6	66.2	93.4	50.8	65.6	160.4
274	5	2	10.5	1	F	2	CASE	245.3	55.5	48.9	2.3	147.8	27.6	33.6	517.9	179.5	94.8	40.2	97.8	121.8	19	32.6	44	181.7	119.5	49.2	100.2	50.8	58.4	163.3
275	5	2	15.4	1	F	1	CONTROL	347.6	68.8	49.4	3.4	156	28.7	29.7	600	163.3	106.2	54.8	117	145.5	19.4	55.3	40.3	174.2	93.7	51.5	100.9	40	56	186
