# Supplementary material for: Altered peripheral amino acid profile indicate a systemic impact of active celiac disease and a possible role of amino acids in disease pathogenesis
Source: PLoS One. 2018 Mar 14;13(3):e0193764. doi: 10.1371/journal.pone.0193764 (PMC5851604; doi:10.1371/journal.pone.0193764)
Supplement: S2 Table — (DOCX) [file pone.0193764.s002.docx]

**S2 Table. Partial correlation coefficients.** Calculated between all pairs of amino acids using age and experimental effects as covariates. Significant correlations are marked with ** <0.01 and * <0.05. The strongest correlation (between proline and citrulline) is marked with borders.

|  | Alanine | Arginine | Asparagine | Aspartic Acid | Citrulline | Cystine | Glutamic Acid | Glutamine | Glycine | Histidine | Isoleucine | Leucine | Lysine | Methionine | Ornithine | Phenylalanine | Proline | Serine | Taurine | Threonine | Tryptophane | Tyrosine | Valine |
| --- | --- | --- | --- | --- | --- | --- | --- | --- | --- | --- | --- | --- | --- | --- | --- | --- | --- | --- | --- | --- | --- | --- | --- |
| Alanine | 1,000 |  |  |  |  |  |  |  |  |  |  |  |  |  |  |  |  |  |  |  |  |  |  |
| Arginine | ,168** | 1,000 |  |  |  |  |  |  |  |  |  |  |  |  |  |  |  |  |  |  |  |  |  |
| Asparagine | ,619** | 0,082 | 1,000 |  |  |  |  |  |  |  |  |  |  |  |  |  |  |  |  |  |  |  |  |
| Aspartic Acid | ,257** | 0,057 | ,287** | 1,000 |  |  |  |  |  |  |  |  |  |  |  |  |  |  |  |  |  |  |  |
| Citrulline | ,442** | ,210** | ,280** | 0,093 | 1,000 |  |  |  |  |  |  |  |  |  |  |  |  |  |  |  |  |  |  |
| Cystine | ,158** | ,285** | 0,106 | -0,038 | ,123* | 1,000 |  |  |  |  |  |  |  |  |  |  |  |  |  |  |  |  |  |
| Glutamic Acid | ,222** | -0,017 | ,160** | ,716** | 0,034 | -0,077 | 1,000 |  |  |  |  |  |  |  |  |  |  |  |  |  |  |  |  |
| Glutamine | ,326** | ,256** | ,441** | -,190** | ,266** | ,230** | -,404** | 1,000 |  |  |  |  |  |  |  |  |  |  |  |  |  |  |  |
| Glycine | ,544** | ,139* | ,503** | ,217** | ,252** | ,145* | ,217** | ,171** | 1,000 |  |  |  |  |  |  |  |  |  |  |  |  |  |  |
| Histidine | ,493** | 0,080 | ,685** | ,342** | ,227** | 0,057 | ,255** | ,341** | ,260** | 1,000 |  |  |  |  |  |  |  |  |  |  |  |  |  |
| Isoleucine | ,201** | ,144* | ,243** | ,354** | ,177** | 0,005 | ,291** | -0,030 | 0,029 | ,354** | 1,000 |  |  |  |  |  |  |  |  |  |  |  |  |
| Leucine | ,176** | 0,050 | ,314** | ,393** | ,142* | -0,033 | ,319** | -0,065 | 0,047 | ,470** | ,892** | 1,000 |  |  |  |  |  |  |  |  |  |  |  |
| Lysine | ,473** | ,223** | ,548** | ,317** | ,357** | ,216** | ,195** | ,233** | ,336** | ,576** | ,375** | ,486** | 1,000 |  |  |  |  |  |  |  |  |  |  |
| Methionine | ,612** | ,339** | ,621** | 0,090 | ,364** | ,218** | -0,043 | ,455** | ,425** | ,517** | ,330** | ,326** | ,562** | 1,000 |  |  |  |  |  |  |  |  |  |
| Ornithine | ,537** | -,215** | ,610** | ,354** | ,313** | -0,033 | ,286** | ,203** | ,506** | ,478** | ,235** | ,357** | ,558** | ,400** | 1,000 |  |  |  |  |  |  |  |  |
| Phenylalanine | ,347** | 0,103 | ,463** | ,446** | ,152* | 0,025 | ,280** | 0,056 | ,213** | ,566** | ,613** | ,727** | ,514** | ,511** | ,409** | 1,000 |  |  |  |  |  |  |  |
| Proline | ,565** | ,215** | ,383** | ,120* | ,910** | ,170** | 0,071 | ,324** | ,283** | ,352** | ,188** | ,169** | ,398** | ,472** | ,397** | ,248** | 1,000 |  |  |  |  |  |  |
| Serine | ,489** | ,120* | ,665** | ,370** | ,268** | 0,057 | ,318** | ,268** | ,628** | ,499** | ,210** | ,222** | ,445** | ,425** | ,508** | ,287** | ,318** | 1,000 |  |  |  |  |  |
| Taurine | ,281** | 0,115 | ,307** | ,518** | 0,042 | -0,038 | ,452** | 0,015 | ,185** | ,334** | ,339** | ,430** | ,298** | ,310** | ,268** | ,389** | 0,113 | ,268** | 1,000 |  |  |  |  |
| Threonine | ,402** | ,214** | ,397** | 0,035 | ,327** | ,132* | 0,104 | ,182** | ,396** | ,288** | ,126* | 0,084 | ,371** | ,415** | ,225** | 0,086 | ,358** | ,539** | 0,017 | 1,000 |  |  |  |
| Tryptophan | ,260** | 0,048 | ,295** | -0,043 | ,127* | ,163** | -0,053 | 0,015 | ,173** | ,269** | ,198** | ,245** | ,356** | ,436** | ,271** | ,392** | ,180** | ,153* | 0,008 | ,242** | 1,000 |  |  |
| Tyrosine | ,484** | ,147* | ,406** | ,160** | ,389** | 0,099 | 0,107 | ,233** | ,309** | ,339** | ,354** | ,382** | ,441** | ,532** | ,449** | ,469** | ,434** | ,332** | ,153* | ,260** | ,365** | 1,000 |  |
| Valine | ,138* | 0,082 | ,209** | ,247** | ,238** | 0,038 | ,159** | -0,037 | -0,032 | ,390** | ,789** | ,840** | ,492** | ,273** | ,253** | ,576** | ,260** | ,155* | ,211** | ,196** | ,330** | ,395** | 1,000 |

** - Correlation is significant at 0.01 level, * - Correlation is significant at 0.05 level
